# Supplementary material for: An amplification-free ultra-sensitive electrochemical CRISPR/Cas biosensor for drug-resistant bacteria detection
Source: Royal Society of Chemistry journal article supplement (doi:10.1039/d1sc02197d), 2021-01-01
Supplement: d1sc02197d1.pdf [file d1sc02197d1.pdf]

Electronic Supplementary Information

## An Amplification-Free Ultra-Sensitive Electrochemical CRISPR/Cas Biosensor for Drug-Resistant Bacteria Detection

Akkapol Suea-Ngam, Philip D. Howes\* and Andrew J. deMello\*

Institute for Chemical and Bioengineering, Department of Chemistry and Applied Biosciences,  
ETH Zürich, Vladimir-Prelog-Weg1,8093Zürich, Switzerland.

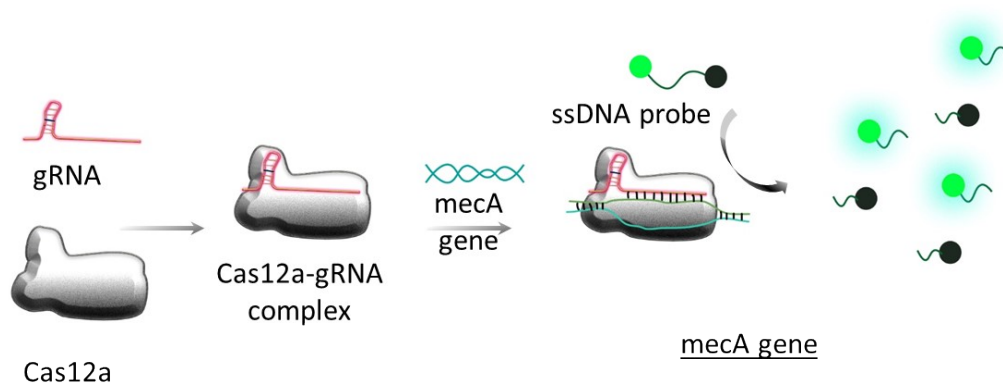

**Scheme S1** Schematic of the fluorometric assay for the CRISPR/Cas biosensor.

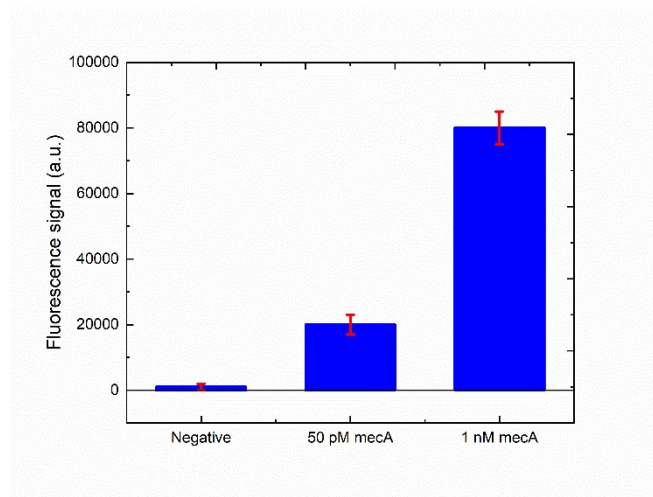

**Figure S1.** Fluorometric signal of 1 nM and 50 pM *mecA* compared to the negative control (i.e. without the *mecA* gene target).

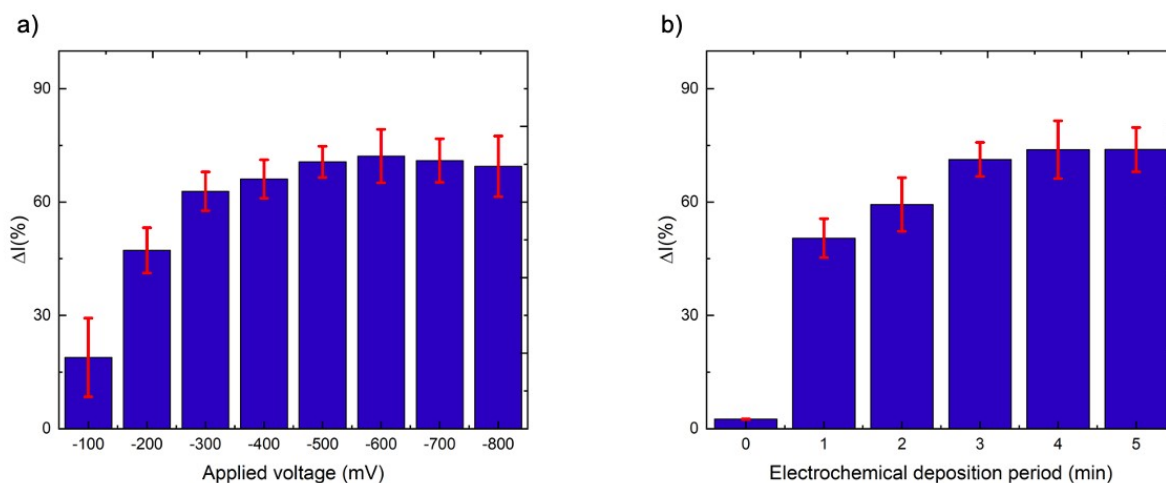

**Figure S2** Electrochemical reduction optimization for E-Si-CRISPR as function of (a) applied voltage (-100 to -800 mV), and (b) electrodeposition time (0 to 5 minutes).

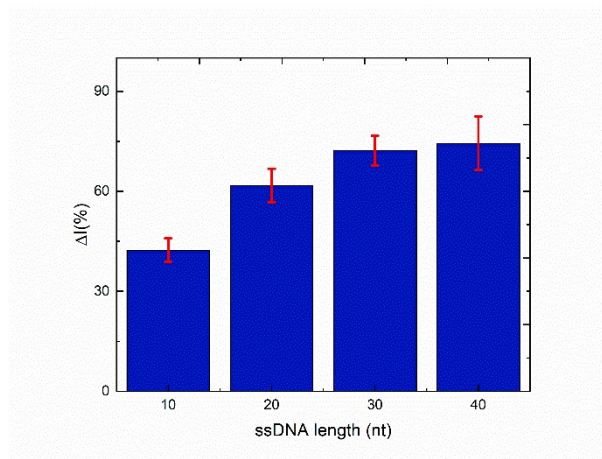

**Figure S3** Thiolated ssDNA length optimization on the electrode surface for E-Si-CRISPR, studied from 10 to 40 nt.

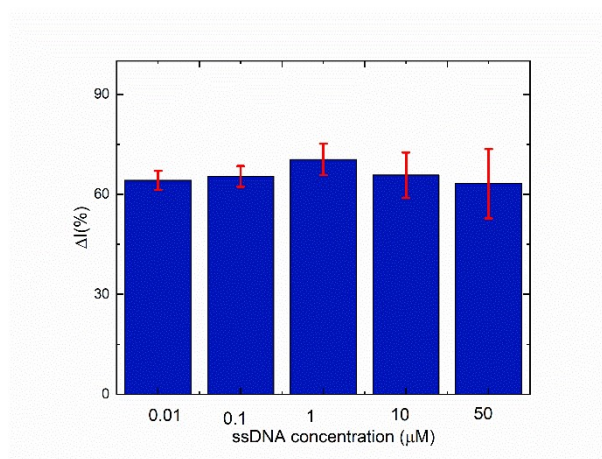

**Figure S4** Thiolated ssDNA concentration optimization on electrode surface for E-Si-CRISPR, studied from 0.01 to 50 μM. The ssDNA was modified and the surface passivated by MCH later.

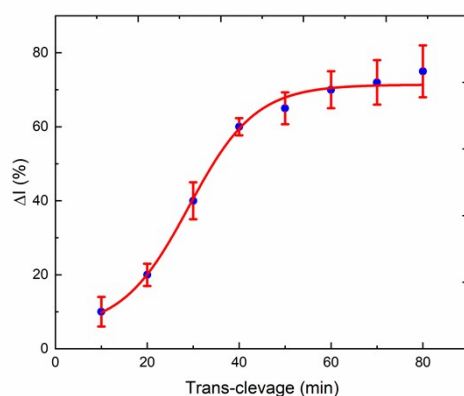

**Figure S5** Trans-cleavage period optimization of the lysed MRSA for E-Si-CRISPR, studied from 10 to 80 minutes.

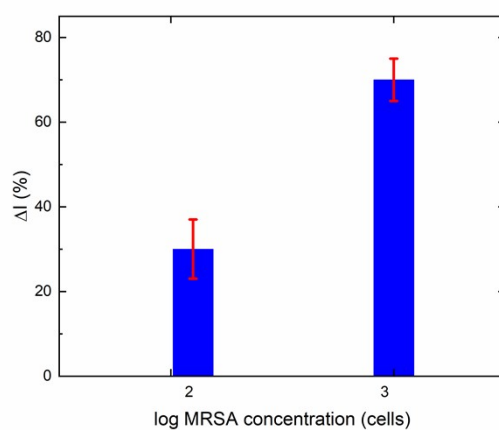

**Figure S6** Electrochemical signal of spiked MRSA cells in human serum with concentration of ca.  $10^2$  and  $10^3$  cells per detection using optimized condition as used in Figure 5b.

**Table S1.** PCR primers for *mecA* amplification, and the oligonucleotides for E-Si-CRISPR

| Name             | Oligonucleotide Sequence                                     |
|------------------|--------------------------------------------------------------|
| LF               | 5' AGATTGGGATCATAGCGTCAT 3'                                  |
| LB               | 5' TTGAGGGTGGATAGCAGTACC 3'                                  |
| up <i>mecA</i>   | 5'-TCT TCA TGT TGG AGC TTT TTA TCG <u>TAA A</u> -3'          |
| down <i>mecA</i> | 5'- <u>TTT ACG</u> ATA AAA AGC TCC AAC ATG AAG A-3'          |
| mmPAM            | 5' TCTTCATGTTGGAGCTTTTTATCG <u>TATA</u> -3'                  |
| mmT1             | 5' TCTTCATGTTGGAGCTTTTTATCT <u>TAAA</u> -3'                  |
| mmA5             | 5' TCTTCATGTTGGAGCTTTTAATCG <u>TAAA</u> -3'                  |
| mmG10            | 5' TCTTCATGTTGGAGTTTTATCG <u>TAAA</u> -3'                    |
| 10nt             | 5' AAAAAAAAAA-3'                                             |
| 20nt             | 5' AAAAAAAAAATTAAAAAAAAA-3'                                  |
| 30nt             | 5' AAAAAAAAAAAAAAAAAATTTAAAAAAAAAAAAAAAA-3'                  |
| 40nt             | 5' AAAAAAAAAAAAAAAAAAAAAAAAAATTAAAAAAAAAAAAAAAAA-3'          |
| FAM Probe        | FAM-TTAATT-BHQ1                                              |
| gRNA             | 5'-uaa uuuu cau cua agu gua gaucga uaa aaa gcu cca aca ug-3' |

**Table S2.** A comparison of reported electrochemical techniques for CRISPR/Cas biosensors.

| Year | Enzyme | Signal Amplification               | Target                 | LoD     | Electrochemical method | Assay Time (h) | Ref       |
|------|--------|------------------------------------|------------------------|---------|------------------------|----------------|-----------|
| 2019 | Cas12a | -                                  | HPV-16                 | 50 pM   | SWV                    | 2              | 1         |
| 2019 | Cas13a | HRP/AntiFAM                        | miRNA-19b              | 10 pM   | CA                     | 4              | 2         |
| 2021 | Cas13a | Catalytic hairpin assembly         | miRNA-21               | 2.6 fM  | DPV                    | 2              | 3         |
| 2020 | Cas12a | Catalytic hairpin assembly         | HPV-16 and -18         | 30 pM   | DPV                    | 1.5            | 4         |
| 2021 | Cas12a | Rolling circle amplification       | ATP                    | 0.46 pM | SWV                    | 5              | 5         |
| 2021 | Cas13a | Catalytic hairpin DNA circuit      | NSCLC-related RNAs     | 0.5 fM  | SWV                    | 1              | 6         |
| 2021 | Cas12a | Recombinase-assisted amplification | Listeria monocytogenes | 0.68 aM | SWV                    | 1.5            | 7         |
| 2021 | Cas12a | -                                  | MRSA                   | 3.5 fM  | SWV                    | 1.5            | This work |

*SWV*: square wave voltammetry, *CA*: chronoamperometry, *DPV*: differential pulse voltammetry

## References

1. <https://doi.org/10.1002/ange.201910772>
2. <https://doi.org/10.1002/adma.201905311>
3. <https://doi.org/10.1016/j.talanta.2020.121878>
4. <https://doi.org/10.1021/acssensors.9b02461>
5. <https://doi.org/10.1021/acs.analchem.1c00805>
6. <https://doi.org/10.1016/j.bios.2021.113027>
7. <https://doi.org/10.1016/j.bios.2021.113073>
